# Supplementary material for: Using high-resolution LiDAR data to quantify the three-dimensional structure of vegetation in urban green space
Source: Springer Nature journal article supplement (doi:10.1007/s11252-016-0571-z), 2016-06-23
Supplement: 11252_2016_571_MOESM1_ESM.pdf [file 11252_2016_571_MOESM1_ESM.pdf]

## Appendix 1. Supplementary Data

**Table S1.** BCC park type descriptions (Brisbane City Council, 2006).

| Type                   | Description                                                                                                                         |
|------------------------|-------------------------------------------------------------------------------------------------------------------------------------|
| Informal Use Park      | Developed and used for informal, unstructured recreational and social activities                                                    |
| Community Use Park     | Developed with built structures to accommodate both formal and informal community activities                                        |
| Landscape Amenity Park | Managed to protect and enhance landmarks, signature points and natural features                                                     |
| Natural Area Park      | Managed to protect and enhance areas of ecological and biodiversity value                                                           |
| Sport Park             | Developed and used for formal, structured sport activities                                                                          |
| Corridor Link Park     | Developed and used for pedestrian and cyclist access between residential areas and key community destinations                       |
| Other Park Land        | Developed and used for a range of non park functions such as works depots, drainage reserves, water storage facilities and quarries |
| Unclassified           | Not classified as any of the above park types                                                                                       |

---

**Table S2.** Measures of association with PC1 and PC2 for each variable used in the PCA.

| <b>Variable</b>               | <b>PC1 scores</b> | <b>PC2 scores</b> |
|-------------------------------|-------------------|-------------------|
| Clumpiness                    | -0.207            | -0.068            |
| Canopy height                 | 0.378             | -0.229            |
| Foliage Projective Cover      | 0.475             | 0.024             |
| Plant Area Index proxy        | 0.332             | -0.232            |
| Foliage Height Diversity      | 0.185             | 0.442             |
| Proportion tree cover         | 0.465             | 0.016             |
| Very low vegetation (0.15-1m) | 0.185             | 0.438             |
| Low vegetation (1-2m)         | 0.141             | 0.481             |
| Medium vegetation (2-5m)      | -0.025            | 0.452             |
| High vegetation (5-10m)       | 0.122             | 0.072             |
| Very high vegetation (>10m)   | 0.398             | -0.245            |

**Table S3.** Description of the three park clusters, including the number of parks, total area of parks, average area per park, percentage of the total park area, and percentage of the total number of parks.

| <b>Cluster</b> | <b># Parks</b> | <b>Area (ha)</b> | <b>Av. Area (ha)</b> | <b>% Total area</b> | <b>% Total # parks</b> |
|----------------|----------------|------------------|----------------------|---------------------|------------------------|
| Cluster 1      | 839            | 2598.05          | 3.10                 | 21.12               | 40.67                  |
| Cluster 2      | 775            | 3003.76          | 3.88                 | 24.41               | 37.57                  |
| Cluster 3      | 449            | 6701.02          | 14.92                | 54.47               | 21.76                  |
| Total          | 2063           | 12,302.82        | 7.3                  | 100                 | 100                    |

**Table S4.** Distribution of BCC park types across the three clusters

| Park Type              | Cluster 1 |           |             | Cluster 2 |           |             | Cluster 3 |           |             |
|------------------------|-----------|-----------|-------------|-----------|-----------|-------------|-----------|-----------|-------------|
|                        | # parks   | % cluster | % park type | # parks   | % cluster | % park type | # parks   | % cluster | % park type |
| Informal Use Park      | 539       | 64.24     | 44.55       | 598       | 77.16     | 49.42       | 73        | 16.26     | 6.03        |
| Community Use Park     | 81        | 9.65      | 53.29       | 62        | 8         | 40.79       | 9         | 2         | 5.92        |
| Landscape Amenity Park | 84        | 10.01     | 38.18       | 66        | 8.52      | 30          | 70        | 15.59     | 31.82       |
| Natural Area Park      | 51        | 6.08      | 13.93       | 29        | 3.74      | 7.92        | 286       | 63.7      | 78.14       |
| Other Park Land        | 79        | 9.42      | 78.22       | 17        | 2.19      | 16.83       | 5         | 1.11      | 4.95        |
| Unclassified           | 5         | 0.6       | 35.71       | 3         | 0.39      | 21.43       | 6         | 1.34      | 42.86       |
| Total                  | 839       | 100       | -           | 775       | 100       | -           | 449       | 100       | -           |

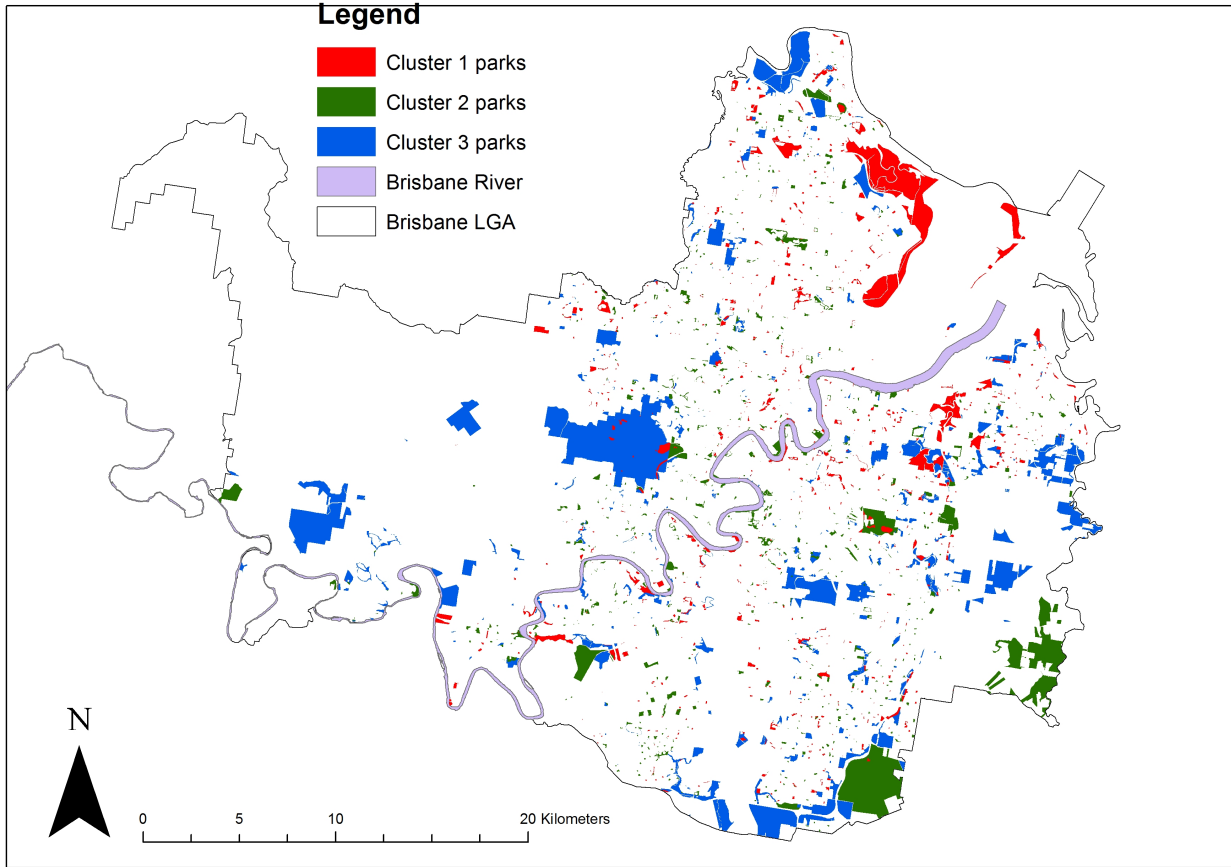

**Figure S1.** Map of the Brisbane Local Government Area (LGA) showing public park clusters from the agglomerative hierarchical clustering of parks based on the spatial and vertical arrangement of vegetation in each park.

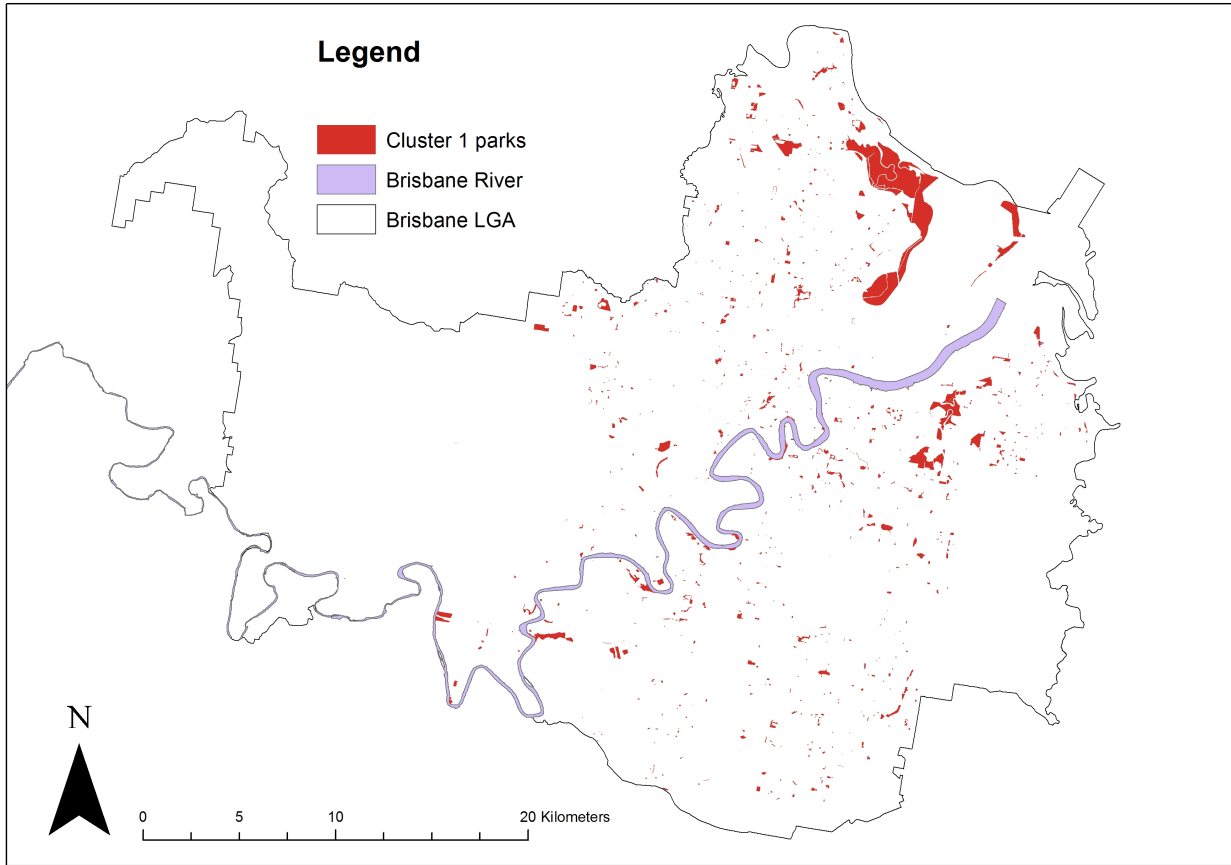

**Figure S2.** Map of the Brisbane Local Government Area (LGA) showing Cluster 1 public parks from the agglomerative hierarchical clustering of parks based on the spatial and vertical arrangement of vegetation in each park.

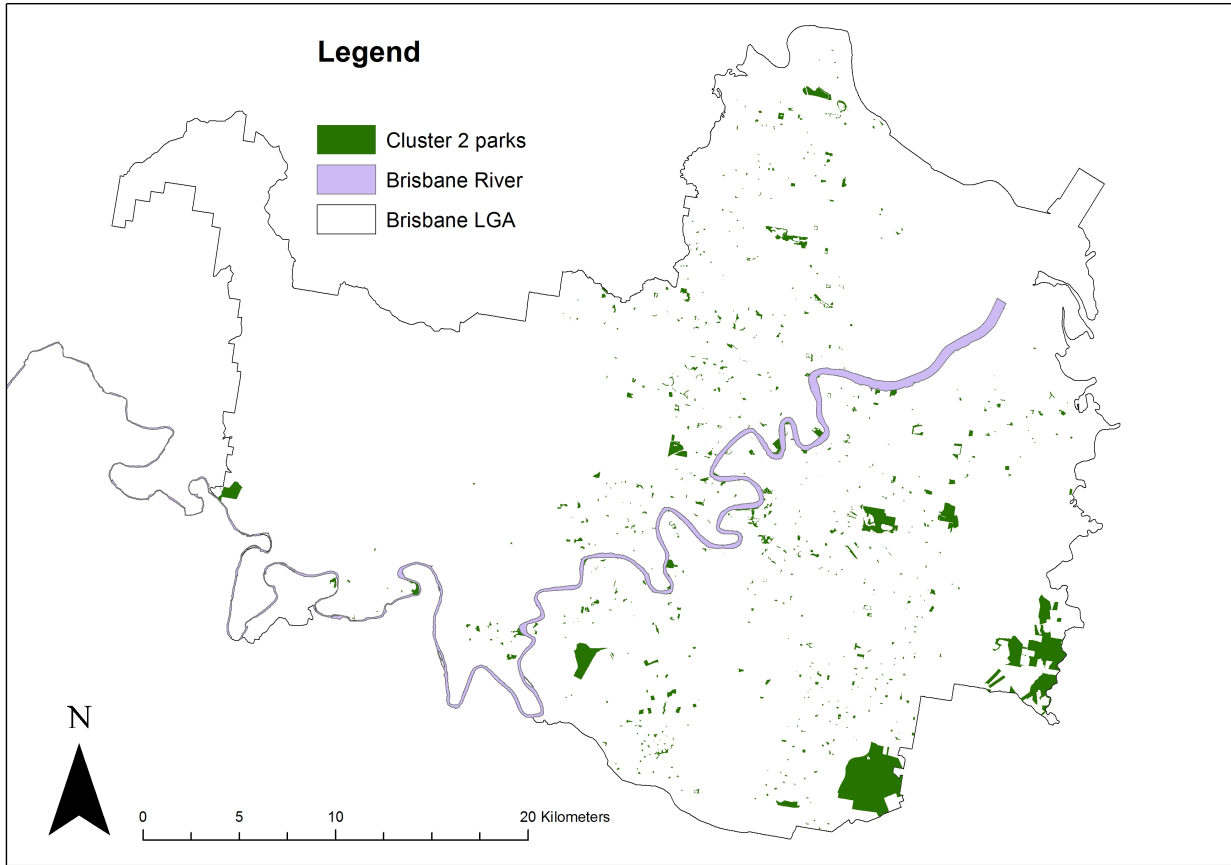

**Figure S3.** Map of the Brisbane Local Government Area (LGA) showing Cluster 2 public parks from the agglomerative hierarchical clustering of parks based on the spatial and vertical arrangement of vegetation in each park.

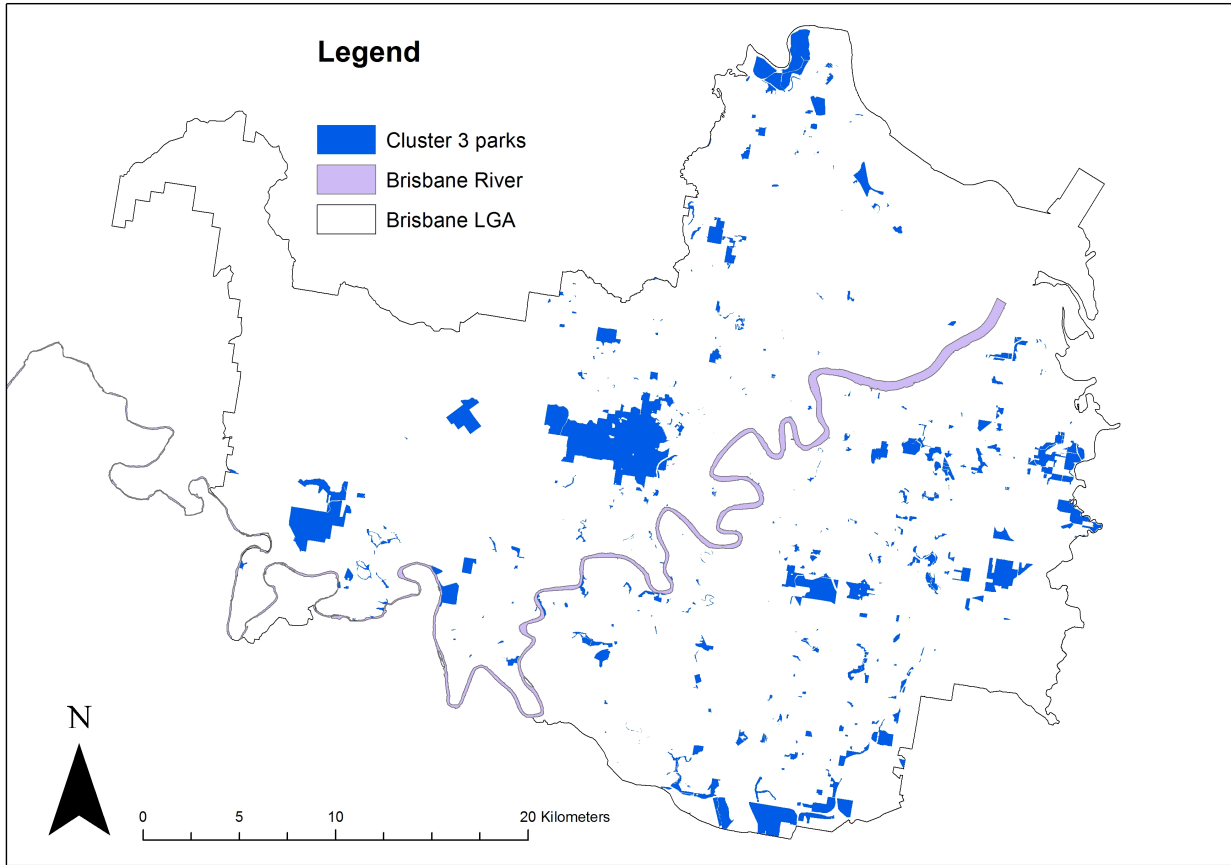

**Figure S4.** Map of the Brisbane Local Government Area (LGA) showing Cluster 3 public parks from the agglomerative hierarchical clustering of parks based on the spatial and vertical arrangement of vegetation in each park.



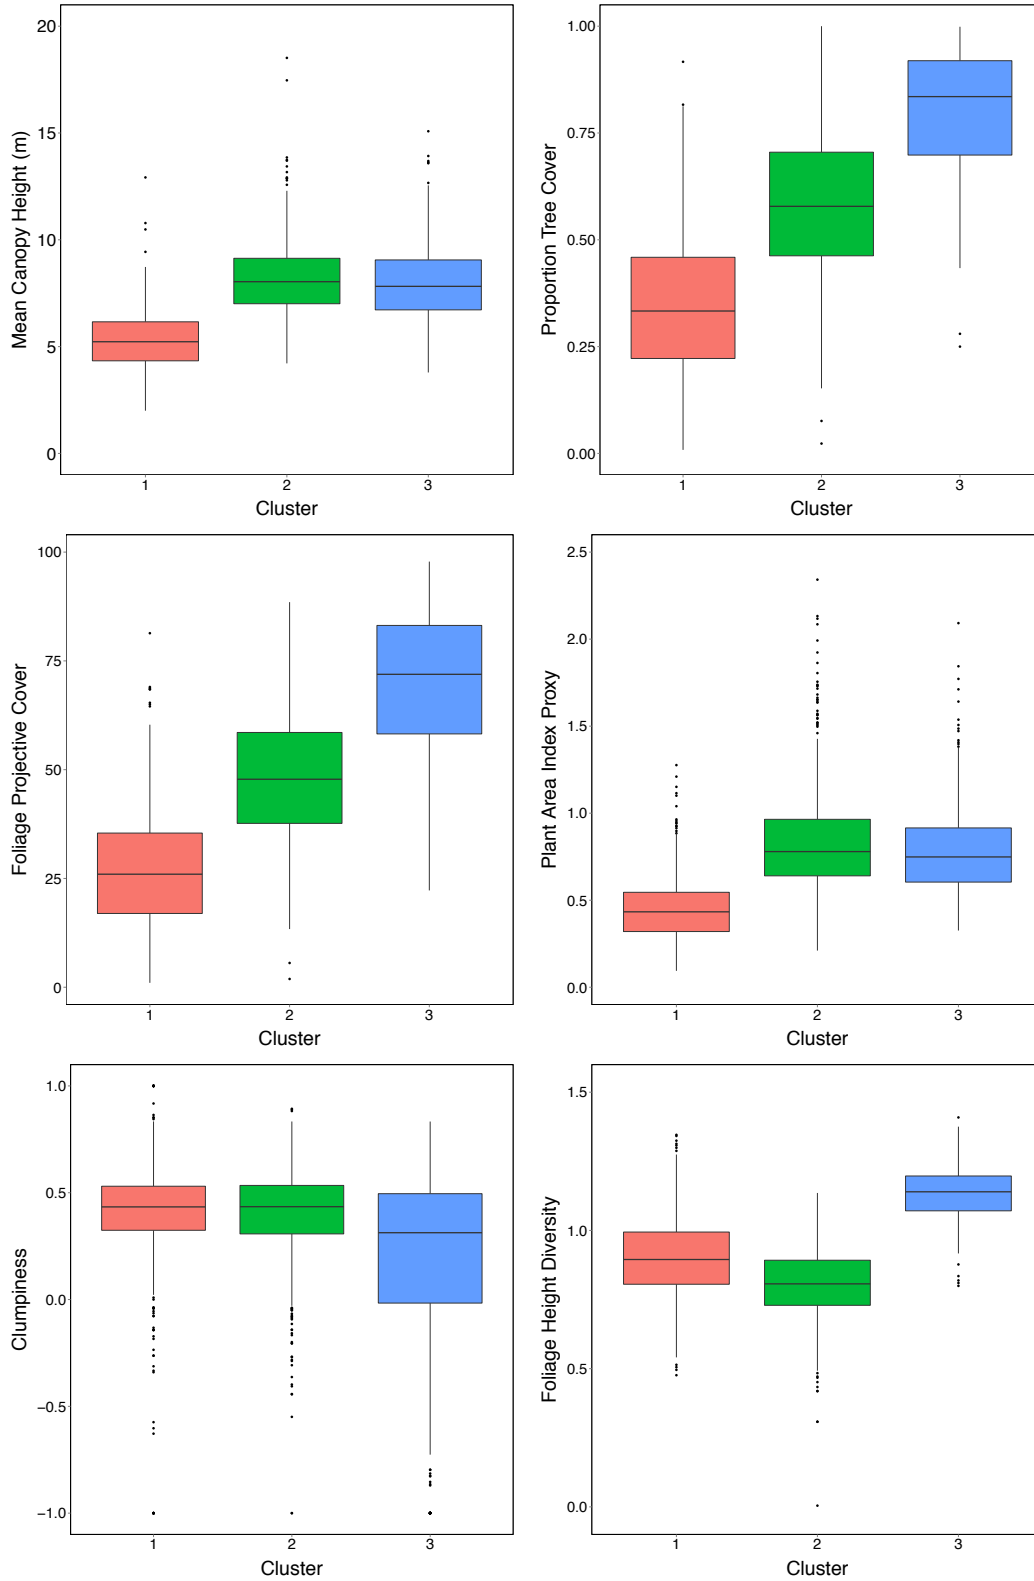

**Figure S5.** Differences in vegetation spatial and vertical arrangement variables between the three Brisbane park clusters identified using agglomerative hierarchical clustering. Figures show the mean (horizontal black line), 25<sup>th</sup> and 75<sup>th</sup> percentiles (bottom and top edges of the boxes, respectively), values within 1.5 inter-quartile range of 25<sup>th</sup> and 75<sup>th</sup> percentiles (bottom and top whiskers, respectively), and outliers (solid points).

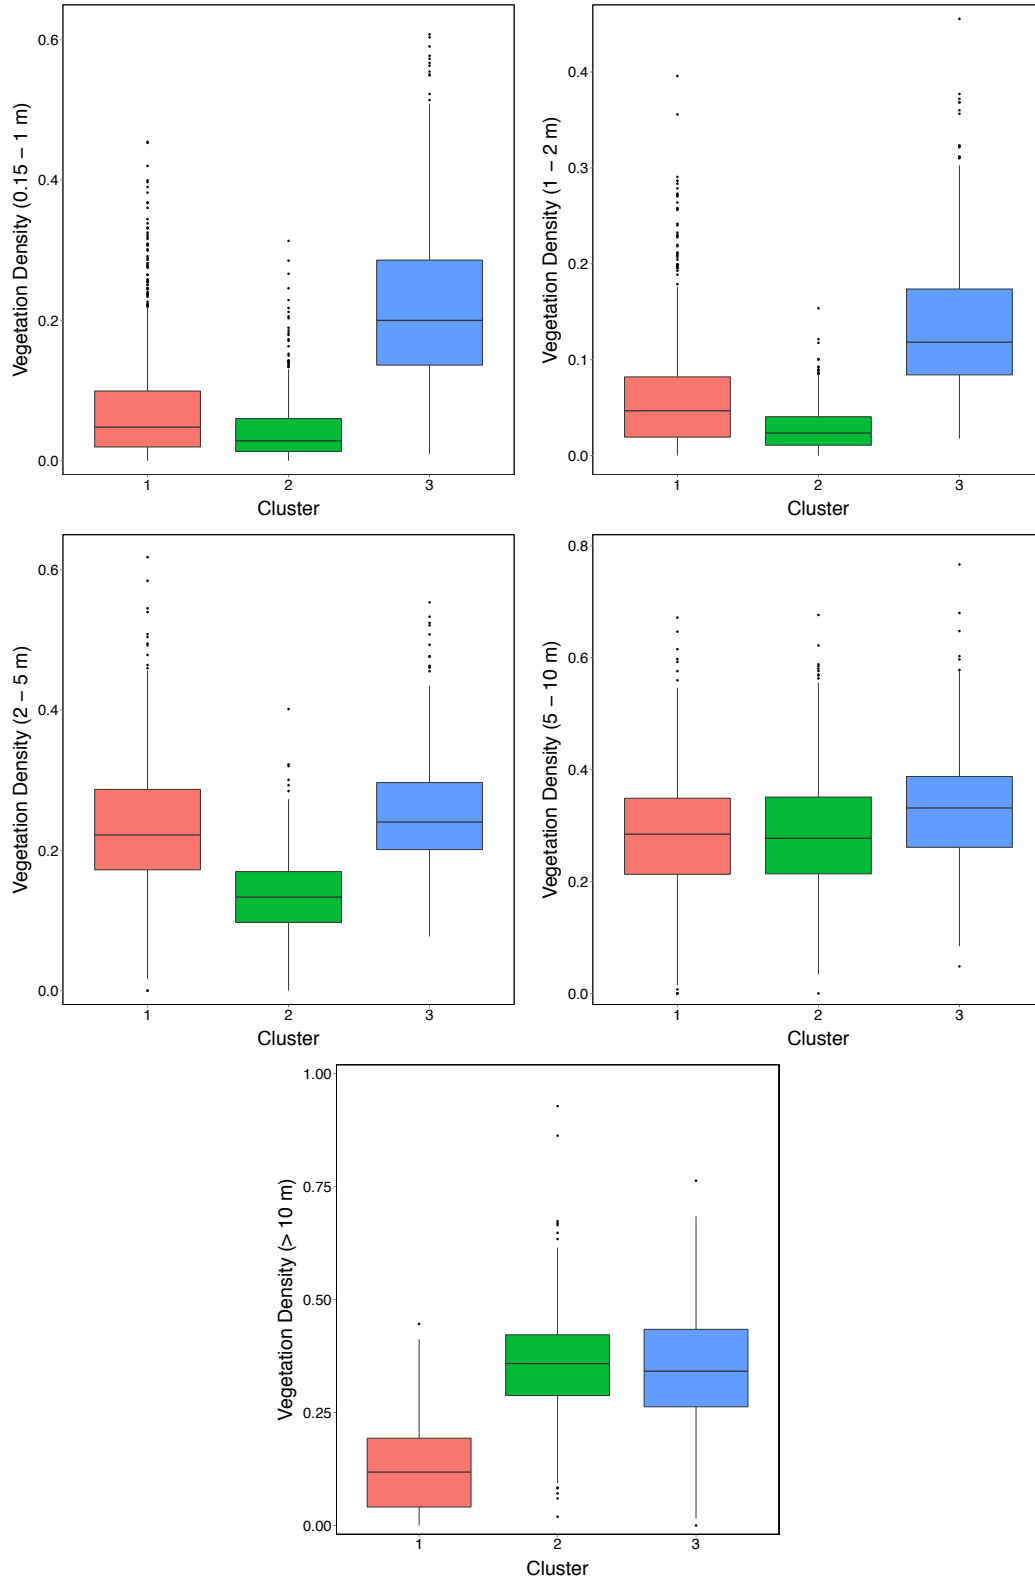

**Figure S6.** Differences in vegetation density in different vertical layers between the three Brisbane park clusters identified using agglomerative hierarchical clustering. Figures show the mean (horizontal black line), 25<sup>th</sup> and 75<sup>th</sup> percentiles (bottom and top edges of the boxes, respectively), values within 1.5 inter-quartile range of 25<sup>th</sup> and 75<sup>th</sup> percentiles (bottom and top whiskers, respectively), and outliers (solid points).
